# Supplementary material for: Flavan-3-ols consumption and cancer risk: a meta-analysis of epidemiologic studies
Source: PubMed Central journal article supplement (PMC5342000; doi:10.18632/oncotarget.12017), 2016-09-14
Supplement: oncotarget-07-73573-s001.pdf [file oncotarget-07-73573-s001.pdf]

## **Flavan-3-ols consumption and cancer risk: A meta-analysis of epidemiologic studies**

### **SUPPLEMENTARY TABLE**

#### **Supplementary Table S1: Flavonoids included in flavan-3-ols**

See Supplementary File 1
